# Supplementary material
Source: bioRxiv or medRxiv preprint supplement (https://www.biorxiv.org/highwire/filestream/123535/field_highwire_adjunct_files/0/218180-1.pdf)
Supplement: Supplementary file [file 218180-1.pdf]

## Supplementary material

Mamad et al 2018

- **Supplementary Movies 1-4**
- **Supplementary Tables 1-18**

### Supplementary Movies:

**Movie 1: TMT-induced aversion.** Navigation in rectangular-shaped linear track of rat with chronically-implanted tetrodes in the hippocampal CA1 region. The animal was trained to navigate between the southwest and northeast corners, where two pellets were continuously positioned. TMT was placed in particular location of the track, which is denoted in red.

**Movie 2: ChR2-induced aversion.** Navigation in rectangular-shaped linear track of rat with chronically-implanted tetrodes in hippocampus. The first half of the video shows pre-ChR2 session, measuring baseline behavioral and electrophysiological activity signals. The second half of the video shows light delivery, triggering photoexcitation of BLA neurons. The coordinates of photostimulation (ChR2 arms) are denoted in blue.

**Movie 3: ChR2-induced aversion.** Pre-ChR2 and ChR2 sessions for second animal.

**Movie 4: Extra-field spiking during ChR2 photostimulation of BLA.** Analysis software visualization of the animal's path (marked with black line) and the recorded place cell's spiking (denoted with purple dots). The represented speed is 2x real-time. The first half of the video shows 238 seconds of pre-ChR2 session, followed by images of the raw signal and the firing map for the entire 12 minutes baseline session. The second half of the video shows 238 seconds of ChR2 session, followed by images of the raw signal and the firing map for the entire 12 minutes ChR2 session. The coordinates of photostimulation (ChR2 arms) are denoted in blue.

**Supplementary Tables:****Supplementary Table 1:** Extra-field TMT spiking ratio and  $\Delta$ COMa of the place cells' spikes in TMT arms.

| Cell# | TMT Mean ratio | TMT Peak ratio | $\Delta$ COMa | Cell# | TMT Mean ratio | TMT Peak ratio | $\Delta$ COMa |
|-------|----------------|----------------|---------------|-------|----------------|----------------|---------------|
| 1     | 0.5            | 0.35           | 26.98         | 28    | 0.8            | 0.8            | 2.95          |
| 2     | 0.82           | 1.1            | 9.53          | 29    | 0.96           | 0.96           | 3.48          |
| 3     | 0.23           | 0.16           | 9.34          | 30    | 0.43           | 0.74           | 28.43         |
| 4     | 0.43           | 0.43           | 21.04         | 31    | 0.11           | 0.17           | 12.86         |
| 5     | 1              | 1              | 8.29          | 32    | 0.47           | 0.63           | 12.75         |
| 6     | 1.05           | 1.5            | 0.94          | 33    | 0.43           | 0.46           | 28.08         |
| 7     | 2              | 2.9            | 4.74          | 34    | 0.72           | 0.81           | 1.92          |
| 8     | 0.07           | 0.04           | 20.79         | 35    | 0.33           | 0.11           | 24.66         |
| 9     | 1              | 1.04           | 20.95         | 36    | 1.04           | 0.7            | 16.06         |
| 10    | 1.25           | 2.25           | 0.24          | 37    | 0.39           | 0.44           | 15.56         |
| 11    | 1.92           | 2.84           | 2.32          | 38    | 0.31           | 0.65           | 25.67         |
| 12    | 0.51           | 0.86           | 6.23          | 39    | 1.03           | 0.76           | 10            |
| 13    | 0.41           | 0.55           | 3.06          | 40    | 0.12           | 0.09           | 57.67         |
| 14    | 0.61           | 1.09           | 3.34          | 41    | 0.51           | 0.26           | 4.81          |
| 15    | 1              | 0.75           | 4.41          | 42    | 0.2            | 0.34           | 7.44          |
| 16    | 0.17           | 0.19           | 44.15         | 43    | 0.08           | 0.31           | 11.6          |
| 17    | 0.25           | 0.21           | 4.62          | 44    | 0.57           | 0.55           | 11.82         |
| 18    | 0.17           | 0.11           | 54.68         | 45    | 0.38           | 0.54           | 7.18          |
| 19    | 1.43           | 1.18           | 16.44         | 46    | 0.51           | 0.65           | 7.93          |
| 20    | 0.38           | 0.41           | 23.29         | 47    | 0.66           | 0.82           | 27.76         |
| 21    | 2.08           | 2.52           | 2.11          | 48    | 0.89           | 0.94           | 4.5           |
| 22    | 1.57           | 2.5            | 2.25          | 49    | 1.21           | 2.87           | 4.34          |
| 23    | 2.36           | 2.99           | 2.99          | 50    | 0.37           | 0.19           | 3.51          |
| 24    | 0.77           | 0.86           | 9.59          | 51    | 0.24           | 0.1            | 8.61          |
| 25    | 0.97           | 1.01           | 2.06          | 52    | 0.07           | 0.09           | 24.2          |
| 26    | 0.32           | 0.17           | 9.18          | 53    | 0.76           | 1.42           | 2.75          |
| 27    | 0.85           | 1.2            | 1.04          | 54    | 0.87           | 0.58           | 0.58          |

**Supplementary Table 2:** Intra-field TMT spiking ratio and  $\Delta$ COMa of the place cells' spikes in TMT arms.

| Cell# | TMT Mean ratio | TMT Peak ratio | $\Delta$ COMa | Cell# | TMT Mean ratio | TMT Peak ratio | $\Delta$ COMa |
|-------|----------------|----------------|---------------|-------|----------------|----------------|---------------|
| 1     | 0.72           | 0.79           | 9.15          | 27    | 1.2            | 1.59           | 5.41          |
| 2     | 0.52           | 0.51           | 1.22          | 28    | 0.79           | 1.91           | 8.02          |
| 3     | 2.67           | 1.33           | 6.58          | 29    | 0.69           | 1.17           | 1.18          |
| 4     | 0.69           | 0.5            | 17.57         | 30    | 0.52           | 1.14           | 3.37          |
| 5     | 0.97           | 1.25           | 2.22          | 31    | 0.62           | 1.2            | 2.66          |
| 6     | 0.35           | 0.41           | 3.85          | 32    | 0.35           | 0.6            | 1.17          |
| 7     | 0.88           | 0.88           | 17.98         | 33    | 1.52           | 2.89           | 13.95         |
| 8     | 3.48           | 4.44           | 1.54          | 34    | 0.09           | 0.08           | 1.79          |
| 9     | 2.05           | 2.99           | 0.15          | 35    | 3.4            | 3.4            | 14.36         |
| 10    | 2.33           | 3.46           | 5.07          | 36    | 1.85           | 2.5            | 1.85          |
| 11    | 0.52           | 0.44           | 13.12         | 37    | 1              | 1.57           | 1.37          |
| 12    | 2.83           | 1.5            | 2.42          | 38    | 0.38           | 0.4            | 17.98         |
| 13    | 0.65           | 0.49           | 1.5           | 39    | 0.33           | 0.6            | 6.41          |
| 14    | 0.75           | 0.75           | 9.35          | 40    | 0.29           | 0.5            | 19.19         |
| 15    | 2.26           | 3.61           | 9.96          | 41    | 1.56           | 1.89           | 5.86          |
| 16    | 0.63           | 0.48           | 3.72          | 42    | 0.78           | 0.89           | 17.52         |
| 17    | 0.58           | 0.67           | 8.65          | 43    | 1.89           | 1.08           | 5.57          |
| 18    | 1.6            | 2.43           | 3.96          | 44    | 0.29           | 0.33           | 0.46          |
| 19    | 1.09           | 3.34           | 0.01          | 45    | 1.38           | 3.97           | 1.39          |
| 20    | 3.31           | 7.32           | 13.13         | 46    | 0.36           | 0.54           | 0.36          |
| 21    | 3.5            | 7.26           | 5.86          | 47    | 0.41           | 0.44           | 4.83          |
| 22    | 2.79           | 3.97           | 5.37          | 48    | 2.58           | 3.19           | 7.32          |
| 23    | 1.4            | 2.58           | 13.5          | 49    | 2.06           | 1.21           | 20.56         |
| 24    | 0.71           | 0.28           | 4.07          | 50    | 0.41           | 0.67           | 14.42         |
| 25    | 2.74           | 5              | 0.91          | 51    | 2.18           | 4.79           | 6.15          |
| 26    | 2.2            | 3.2            | 17.11         | 52    | 0.61           | 0.7            | 12.02         |

**Supplementary Table 3:** Intra-field TMT spiking ratio and  $\Delta$ COMa of the place cells' spikes in non-TMT zone.

| Cell# | TMT Mean ratio | TMT Peak ratio | $\Delta$ COMa | Cell# | TMT Mean ratio | TMT Peak ratio | $\Delta$ COMa |
|-------|----------------|----------------|---------------|-------|----------------|----------------|---------------|
| 1     | 3.13           | 2.68           | 26.98         | 29    | 0.23           | 0.22           | 2.95          |
| 2     | 1.4            | 0.64           | 9.53          | 30    | 0.27           | 0.2            | 3.48          |
| 3     | 2.1            | 2.78           | 9.34          | 31    | 0.38           | 0.42           | 28.43         |
| 4     | 1.07           | 1.35           | 26.03         | 32    | 1.35           | 1.44           | 12.86         |
| 5     | 3.33           | 2.35           | 21.04         | 33    | 0.69           | 1.87           | 12.75         |
| 6     | 0.67           | 1.45           | 0.94          | 34    | 0.41           | 0.33           | 28.08         |
| 7     | 1.39           | 2              | 4.74          | 35    | 0.58           | 1              | 1.92          |
| 8     | 1.15           | 0.48           | 20.79         | 36    | 0.58           | 0.27           | 24.66         |
| 9     | 0.68           | 0.67           | 10.77         | 37    | 0.9            | 0.47           | 16.06         |
| 10    | 0.77           | 0.69           | 3.18          | 38    | 0.78           | 0.3            | 15.56         |
| 11    | 0.71           | 0.38           | 16.28         | 39    | 1.32           | 1.12           | 25.67         |
| 12    | 1.25           | 0.65           | 2.32          | 40    | 0.2            | 0.08           | 10            |
| 13    | 0.48           | 0.82           | 6.23          | 41    | 0.1            | 0.09           | 57.67         |
| 14    | 0.4            | 0.62           | 3.06          | 42    | 0.19           | 0.08           | 4.81          |
| 15    | 0.6            | 0.71           | 3.34          | 43    | 0.25           | 0.17           | 7.44          |
| 16    | 3.57           | 2.63           | 4.41          | 44    | 0.03           | 0.02           | 11.6          |
| 17    | 0.85           | 0.46           | 44.15         | 45    | 1.07           | 0.71           | 11.82         |
| 18    | 0.42           | 0.36           | 4.62          | 46    | 1.21           | 0.4            | 7.18          |
| 19    | 0.96           | 0.79           | 54.68         | 47    | 0.22           | 0.22           | 7.93          |
| 20    | 0.66           | 0.63           | 16.44         | 48    | 0.88           | 1.09           | 27.76         |
| 21    | 1.24           | 0.67           | 23.29         | 49    | 1.04           | 1.5            | 4.5           |
| 22    | 2.54           | 2.5            | 2.11          | 50    | 1.92           | 2.23           | 4.34          |
| 23    | 1.79           | 1.33           | 1.39          | 51    | 0.44           | 0.44           | 3.51          |
| 24    | 3.38           | 4.18           | 3.31          | 52    | 0.6            | 0.54           | 8.61          |
| 25    | 1.02           | 0.68           | 9.59          | 53    | 4.2            | 4.17           | 24.2          |
| 26    | 2.8            | 5.26           | 2.06          | 54    | 0.45           | 0.25           | 2.75          |
| 27    | 0.4            | 0.12           | 9.18          | 55    | 1.38           | 0.82           | 1.95          |
| 28    | 0.72           | 0.84           | 1.04          | 56    |                |                |               |

**Supplementary Table 4:** Extra-field TMT spiking ratio and  $\Delta$ COMa of the place cells' spikes in non-TMT zone.

| Cell# | TMT Mean ratio | TMT Peak ratio | $\Delta$ COMa | Cell# | TMT Mean ratio | TMT Peak ratio | $\Delta$ COMa |
|-------|----------------|----------------|---------------|-------|----------------|----------------|---------------|
| 1     | 1.55           | 1.87           | 9.15          | 27    | 0.26           | 0.24           | 8.02          |
| 2     | 0.81           | 1.17           | 1.22          | 28    | 0.16           | 0.09           | 1.18          |
| 3     | 2.63           | 1.67           | 6.58          | 29    | 0.39           | 0.15           | 3.37          |
| 4     | 2              | 3.25           | 2.22          | 30    | 0.96           | 2.82           | 2.66          |
| 5     | 0.44           | 0.33           | 3.85          | 31    | 4.62           | 5.39           | 1.17          |
| 6     | 3.33           | 6.06           | 17.98         | 32    | 0.86           | 1.67           | 13.95         |
| 7     | 0.43           | 0.33           | 1.54          | 33    | 0.5            | 0.41           | 1.79          |
| 8     | 1.25           | 2.09           | 0.15          | 34    | 0.46           | 1.25           | 14.36         |
| 9     | 1.12           | 1.25           | 5.07          | 35    | 1.18           | 1.13           | 1.85          |
| 10    | 0.47           | 0.5            | 13.12         | 36    | 1.14           | 1.14           | 1.37          |
| 11    | 0.86           | 0.91           | 2.42          | 37    | 0.59           | 0.4            | 17.98         |
| 12    | 0.83           | 0.75           | 1.5           | 38    | 0.65           | 0.4            | 6.41          |
| 13    | 2.33           | 1.27           | 9.35          | 39    | 0.35           | 0.13           | 19.19         |
| 14    | 0.88           | 1.5            | 9.96          | 40    | 0.22           | 0.12           | 5.86          |
| 15    | 2.93           | 5.56           | 3.72          | 41    | 0.18           | 0.06           | 17.52         |
| 16    | 0.36           | 1              | 8.65          | 42    | 0.59           | 0.5            | 5.57          |
| 17    | 1.06           | 1.03           | 3.96          | 43    | 1.1            | 1.88           | 0.46          |
| 18    | 0.21           | 0.08           | 0.01          | 44    | 0.26           | 0.22           | 1.39          |
| 19    | 0.51           | 0.2            | 13.13         | 45    | 1.02           | 0.92           | 0.36          |
| 20    | 2.41           | 4              | 5.86          | 46    | 0.44           | 0.33           | 4.83          |
| 21    | 0.84           | 1              | 5.37          | 47    | 0.35           | 0.22           | 7.32          |
| 22    | 1.67           | 1              | 13.5          | 48    | 0.94           | 0.94           | 1.77          |
| 23    | 3.12           | 2.2            | 4.07          | 49    | 2.82           | 3.56           | 20.56         |
| 24    | 1.98           | 1.98           | 0.91          | 50    | 1.99           | 4.39           | 14.42         |
| 25    | 0.58           | 0.22           | 17.11         | 51    | 1.82           | 3.05           | 6.15          |
| 26    | 1.05           | 1              | 5.41          | 52    | 1.18           | 0.86           | 12.02         |

**Supplementary Table 5.** Unidirectional ethanol spiking comparison and  $\Delta$ COM for clockwise fields:

| Cell# | Mean rate | Peak rate | $\Delta$ COM | Cell# | Mean rate | Peak rate | $\Delta$ COM |
|-------|-----------|-----------|--------------|-------|-----------|-----------|--------------|
| 1     | 0.020     | 0.013     | 7.00         | 41    | 0.123     | 0.103     | 0.00         |
| 2     | 0.660     | 0.516     | 6.71         | 42    | -0.049    | -0.206    | 16.28        |
| 3     | 0.141     | 0.100     | 0.00         | 43    | 0.440     | 0.498     | 6.00         |
| 4     | 0.167     | 0.130     | 0.00         | 44    | -0.024    | 0.144     | 5.00         |
| 5     | -0.368    | -0.400    | 0.00         | 45    | 0.037     | 0.116     | 3.00         |
| 6     | -0.137    | -0.143    | 0.00         | 46    | -0.356    | -0.576    | 6.71         |
| 7     | 0.200     | 0.241     | 4.00         |       |           |           |              |
| 8     | -0.289    | -0.204    | 4.00         |       |           |           |              |
| 9     | -0.195    | -0.425    | 7.00         |       |           |           |              |
| 10    | 0.134     | 0.355     | 7.00         |       |           |           |              |
| 11    | -0.238    | -0.313    | 3.00         |       |           |           |              |
| 12    | -0.210    | -0.053    | 13.00        |       |           |           |              |
| 13    | 0.294     | 0.227     | 6.00         |       |           |           |              |
| 14    | 0.535     | 0.107     | 4.24         |       |           |           |              |
| 15    | 0.150     | 0.220     | 2.00         |       |           |           |              |
| 16    | 0.497     | 0.678     | 7.62         |       |           |           |              |
| 17    | -0.309    | -0.357    | 0.00         |       |           |           |              |
| 18    | -0.268    | 0.506     | 10.44        |       |           |           |              |
| 19    | -0.421    | -0.425    | 0.00         |       |           |           |              |
| 20    | -0.551    | -0.634    | 5.00         |       |           |           |              |
| 21    | -0.260    | -0.507    | 4.00         |       |           |           |              |
| 22    | 0.380     | 0.434     | 3.00         |       |           |           |              |
| 23    | 0.217     | 0.350     | 3.00         |       |           |           |              |
| 24    | -0.032    | -0.044    | 6.71         |       |           |           |              |
| 25    | 0.000     | 0.038     | 0.00         |       |           |           |              |
| 26    | 0.013     | -0.095    | 10.00        |       |           |           |              |
| 27    | 0.343     | 0.313     | 4.24         |       |           |           |              |
| 28    | 0.080     | -0.067    | 9.22         |       |           |           |              |
| 29    | -0.135    | -0.168    | 3.00         |       |           |           |              |
| 30    | 0.088     | 0.078     | 5.00         |       |           |           |              |
| 31    | -0.147    | -0.240    | 5.00         |       |           |           |              |
| 32    | 0.054     | -0.036    | 7.00         |       |           |           |              |
| 33    | -0.070    | 0.053     | 16.00        |       |           |           |              |
| 34    | -0.233    | -0.104    | 4.24         |       |           |           |              |
| 35    | -0.154    | 0.007     | 7.21         |       |           |           |              |
| 36    | 0.040     | 0.041     | 10.44        |       |           |           |              |
| 37    | 0.058     | -0.109    | 0.00         |       |           |           |              |
| 38    | 0.250     | 0.402     | 7.00         |       |           |           |              |
| 39    | 0.061     | 0.026     | 3.00         |       |           |           |              |
| 40    | 0.025     | 0.089     | 3.00         |       |           |           |              |

**Supplementary Table 6:** Figure 5-2. Unidirectional ethanol spiking comparison and  $\Delta$ COM, counter-clockwise fields:

| Cell# | Mean rate | Peak rate | $\Delta$ COM | Cell# | Mean rate | Peak rate | $\Delta$ COM |
|-------|-----------|-----------|--------------|-------|-----------|-----------|--------------|
| 1     | 0.208     | 0.046     | 6.00         |       |           |           |              |
| 2     | -0.241    | -0.320    | 6.00         |       |           |           |              |
| 3     | 0.191     | 0.054     | 6.00         |       |           |           |              |
| 4     | -0.245    | -0.212    | 5.00         |       |           |           |              |
| 5     | -0.097    | 0.009     | 4.00         |       |           |           |              |
| 6     | 0.216     | 0.099     | 4.24         |       |           |           |              |
| 7     | 0.040     | 0.202     | 3.00         |       |           |           |              |
| 8     | -0.300    | -0.150    | 7.62         |       |           |           |              |
| 9     | 0.333     | 0.500     | 3.00         |       |           |           |              |
| 10    | -0.412    | -0.336    | 9.00         |       |           |           |              |
| 11    | -0.092    | -0.189    | 9.00         |       |           |           |              |
| 12    | 0.615     | 0.783     | 3.00         |       |           |           |              |
| 13    | 0.027     | -0.003    | 0.00         |       |           |           |              |
| 14    | -0.303    | -0.201    | 7.00         |       |           |           |              |
| 15    | 0.031     | 0.184     | 10.44        |       |           |           |              |
| 16    | 0.351     | 0.400     | 3.00         |       |           |           |              |
| 17    | -0.193    | 0.016     | 6.00         |       |           |           |              |
| 18    | 0.543     | 0.519     | 10.44        |       |           |           |              |
| 19    | 0.000     | -0.077    | 4.24         |       |           |           |              |
| 20    | 0.183     | 0.154     | 0.00         |       |           |           |              |
| 21    | 0.028     | 0.071     | 4.24         |       |           |           |              |
| 22    | 0.482     | 0.550     | 3.00         |       |           |           |              |
| 23    | 0.162     | 0.038     | 3.00         |       |           |           |              |
| 24    | 0.167     | 0.282     | 10.44        |       |           |           |              |
| 25    | 0.169     | 0.167     | 8.49         |       |           |           |              |
| 26    | -0.200    | -0.067    | 5.00         |       |           |           |              |
| 27    | -0.027    | -0.053    | 6.00         |       |           |           |              |
| 28    | -0.255    | -0.246    | 10.44        |       |           |           |              |
| 29    | 0.043     | 0.029     | 3.00         |       |           |           |              |
| 30    | -0.362    | -0.483    | 5.66         |       |           |           |              |
| 31    | -0.102    | 0.058     | 6.00         |       |           |           |              |
| 32    | -0.028    | -0.039    | 6.71         |       |           |           |              |
| 33    | -0.052    | -0.067    | 3.00         |       |           |           |              |
| 34    | -0.206    | -0.335    | 13.00        |       |           |           |              |
| 35    | 0.053     | -0.196    | 7.00         |       |           |           |              |
| 36    | 0.437     | 0.025     | 9.22         |       |           |           |              |
| 37    | -0.075    | -0.064    | 0.00         |       |           |           |              |
| 38    | 0.012     | -0.017    | 4.00         |       |           |           |              |
| 39    | -0.364    | -0.361    | 0.00         |       |           |           |              |
| 40    | -0.175    | -0.088    | 0.00         |       |           |           |              |

**Supplementary Table 7:** Unidirectional TMT-SW spiking comparison and  $\Delta$ COM for clockwise fields:

| Cell# | Mean rate | Peak rate | $\Delta$ COM | Cell# | Mean rate | Peak rate | $\Delta$ COM |
|-------|-----------|-----------|--------------|-------|-----------|-----------|--------------|
| 1     | -0.128    | -0.096    | 0.00         | 41    | 0.125     | 0.200     | 6.00         |
| 2     | 0.048     | 0.170     | 10.00        | 42    | 0.038     | 0.012     | 3.00         |
| 3     | -0.485    | -0.534    | 67.54        | 43    | -0.089    | -0.033    | 3.00         |
| 4     | -0.061    | 0.029     | 79.25        | 44    | -0.277    | -0.088    | 7.62         |
| 5     | 0.356     | 0.337     | 0.00         | 45    | 0.167     | 0.275     | 56.08        |
| 6     | 0.286     | 0.026     | 4.00         | 46    | 0.308     | 0.175     | 7.21         |
| 7     | 0.111     | 0.092     | 17.46        | 47    | 0.355     | 0.377     | 16.00        |
| 8     | 0.333     | 0.079     | 32.00        | 48    | 0.000     | -0.078    | 30.48        |
| 9     | -0.145    | -0.372    | 32.14        | 49    | -0.231    | -0.311    | 6.71         |
| 10    | -0.078    | 0.023     | 3.00         | 50    | 0.034     | -0.709    | 35.13        |
| 11    | 0.117     | -0.003    | 70.60        | 51    | 0.803     | 0.754     | 71.61        |
| 12    | -0.407    | -0.499    | 6.32         | 52    | -0.263    | -0.032    | 55.95        |
| 13    | 0.021     | 0.153     | 13.60        |       |           |           |              |
| 14    | 0.361     | 0.453     | 3.00         |       |           |           |              |
| 15    | -0.190    | -0.187    | 9.49         |       |           |           |              |
| 16    | 0.496     | 0.534     | 0.00         |       |           |           |              |
| 17    | 0.343     | 0.596     | 72.45        |       |           |           |              |
| 18    | -0.226    | -0.524    | 0.00         |       |           |           |              |
| 19    | -0.444    | -0.295    | 4.24         |       |           |           |              |
| 20    | 0.538     | 0.619     | 8.06         |       |           |           |              |
| 21    | 0.150     | 0.262     | 7.00         |       |           |           |              |
| 22    | 0.448     | 0.370     | 11.00        |       |           |           |              |
| 23    | 0.137     | 0.074     | 55.95        |       |           |           |              |
| 24    | 0.429     | 0.189     | 41.34        |       |           |           |              |
| 25    | -0.516    | -0.473    | 24.00        |       |           |           |              |
| 26    | -0.533    | -0.456    | 30.68        |       |           |           |              |
| 27    | 0.000     | 0.231     | 22.20        |       |           |           |              |
| 28    | -0.167    | 0.091     | 9.00         |       |           |           |              |
| 29    | -0.247    | -0.218    | 10.44        |       |           |           |              |
| 30    | 0.314     | 0.370     | 8.06         |       |           |           |              |
| 31    | -0.016    | 0.163     | 3.00         |       |           |           |              |
| 32    | -0.462    | -0.433    | 43.17        |       |           |           |              |
| 33    | -0.159    | -0.098    | 0.00         |       |           |           |              |
| 34    | 0.490     | 0.429     | 69.77        |       |           |           |              |
| 35    | -0.152    | 0.424     | 29.27        |       |           |           |              |
| 36    | 0.443     | 0.538     | 4.00         |       |           |           |              |
| 37    | -0.083    | -0.183    | 4.00         |       |           |           |              |
| 38    | 0.000     | 0.000     | 0.00         |       |           |           |              |
| 39    | -0.680    | -0.273    | 30.87        |       |           |           |              |
| 40    | -0.038    | 0.100     | 0.00         |       |           |           |              |



**Supplementary Table 8:** Unidirectional TMT-SW spiking comparison and  $\Delta$ COM, counter-clockwise fields:

| Cell# | Mean rate | Peak rate | $\Delta$ COM | Cell# | Mean rate | Peak rate | $\Delta$ COM |
|-------|-----------|-----------|--------------|-------|-----------|-----------|--------------|
| 1     | -0.471    | -0.478    | 4.00         | 40    | 0.135     | -0.216    | 55.00        |
| 2     | -0.247    | -0.288    | 0.00         | 41    | -0.165    | -0.424    | 61.03        |
| 3     | 0.407     | 0.444     | 76.85        | 42    | -0.745    | -0.740    | 32.25        |
| 4     | 0.081     | 0.297     | 0.00         | 43    | -0.214    | 0.081     | 70.60        |
| 5     | -0.263    | -0.351    | 78.24        | 44    | -0.200    | 0.077     | 9.00         |
| 6     | 0.864     | 0.922     | 20.40        | 45    | -0.589    | -0.712    | 55.80        |
| 7     | 0.778     | 0.741     | 0.00         | 46    | 0.135     | -0.216    | 55.00        |
| 8     | 0.368     | 0.000     | 35.00        |       |           |           |              |
| 9     | 0.544     | 0.717     | 16.00        |       |           |           |              |
| 10    | 0.231     | 0.403     | 5.00         |       |           |           |              |
| 11    | -0.205    | 0.072     | 5.39         |       |           |           |              |
| 12    | -0.391    | -0.259    | 0.00         |       |           |           |              |
| 13    | -0.277    | 0.000     | 69.86        |       |           |           |              |
| 14    | 0.105     | 0.207     | 0.00         |       |           |           |              |
| 15    | 0.300     | 0.034     | 0.00         |       |           |           |              |
| 16    | 0.143     | 0.042     | 29.15        |       |           |           |              |
| 17    | -0.341    | -0.427    | 6.00         |       |           |           |              |
| 18    | 0.302     | 0.229     | 64.85        |       |           |           |              |
| 19    | 0.037     | -0.024    | 75.29        |       |           |           |              |
| 20    | 0.448     | 0.267     | 41.44        |       |           |           |              |
| 21    | 0.250     | 0.416     | 9.00         |       |           |           |              |
| 22    | 0.121     | 0.194     | 0.00         |       |           |           |              |
| 23    | -0.095    | 0.000     | 16.28        |       |           |           |              |
| 24    | 0.091     | 0.302     | 76.55        |       |           |           |              |
| 25    | 0.000     | 0.167     | 8.06         |       |           |           |              |
| 26    | -0.135    | -0.081    | 0.00         |       |           |           |              |
| 27    | 0.118     | -0.114    | 7.62         |       |           |           |              |
| 28    | -0.364    | -0.354    | 9.90         |       |           |           |              |
| 29    | -0.357    | -0.538    | 54.92        |       |           |           |              |
| 30    | -0.487    | -0.200    | 7.62         |       |           |           |              |
| 31    | -0.051    | -0.087    | 4.24         |       |           |           |              |
| 32    | 0.143     | 0.156     | 19.00        |       |           |           |              |
| 33    | 0.128     | 0.231     | 11.00        |       |           |           |              |
| 34    | -0.420    | -0.495    | 3.00         |       |           |           |              |
| 35    | 0.204     | 0.178     | 7.00         |       |           |           |              |
| 36    | 0.014     | -0.109    | 10.44        |       |           |           |              |
| 37    | 0.942     | 0.859     | 64.85        |       |           |           |              |
| 38    | 0.518     | 0.479     | 3.00         |       |           |           |              |
| 39    | 0.191     | 0.172     | 10.44        |       |           |           |              |
| 40    | -0.508    | -0.653    | 0.00         |       |           |           |              |





**Supplementary Table 11:** Extra-field ChR2 spiking ratio and  $\Delta$ COMa of the place cells' spikes in ChR2 arms:

| Cell# | ChR2 Mean ratio | ChR2 Peak ratio | $\Delta$ COMa | Cell# | ChR2 Mean ratio | ChR2 Peak ratio | $\Delta$ COMa |
|-------|-----------------|-----------------|---------------|-------|-----------------|-----------------|---------------|
| 1     | 1.11            | 1.27            | 5.35          | 20    | 0.16            | 0.08            | 24.8          |
| 2     | 1.25            | 1.4             | 3.77          | 21    | 0.69            | 0.69            | 4.9           |
| 3     | 1.44            | 1.51            | 5.77          | 22    | 1.18            | 1.26            | 4.36          |
| 4     | 1.85            | 1.37            | 2.5           | 23    | 0.74            | 1.5             | 10.71         |
| 5     | 0.24            | 0.14            | 15.3          | 24    | 0.6             | 0.6             | 22.84         |
| 6     | 0.4             | 0.28            | 6.42          | 25    | 4.63            | 2.25            | 4.83          |
| 7     | 1.11            | 1.03            | 1.91          | 26    | 3.38            | 1.32            | 6.12          |
| 8     | 2.25            | 2.25            | 0.84          | 27    | 1.89            | 0.9             | 0.31          |
| 9     | 1.22            | 1.82            | 7             | 28    | 1.47            | 1.29            | 8.24          |
| 10    | 0.61            | 0.22            | 19.98         | 29    | 1.02            | 1.5             | 6.31          |
| 11    | 3.63            | 2.11            | 7.88          | 30    | 0.09            | 0.03            | 35.98         |
| 12    | 0.45            | 0.39            | 3.42          | 31    | 1.7             | 1.4             | 30.23         |
| 13    | 0.79            | 0.79            | 9.01          | 32    | 1.16            | 1.52            | 9.13          |
| 14    | 0.6             | 0.6             | 3.54          | 33    | 0.66            | 0.26            | 5.65          |
| 15    | 1.21            | 2.23            | 22.4          | 34    | 0.33            | 0.1             | 23.15         |
| 16    | 0.28            | 0.31            | 34.73         | 35    | 0.66            | 0.33            | 13.63         |
| 17    | 4.4             | 3.55            | 0.53          | 36    | 1.06            | 1.1             | 4.33          |
| 18    | 2               | 1.3             | 1.02          | 37    | 0.57            | 0.31            | 7.89          |
| 19    | 0.73            | 0.36            | 16.87         | 38    | 0.67            | 0.67            | 17.14         |

**Supplementary Table 12:** Intra-field ChR2 spiking ratio and  $\Delta$ COMa of the place cells' spikes in ChR2 arms:

| Cell# | ChR2 Mean ratio | ChR2 Peak ratio | $\Delta$ COMa | Cell# | ChR2 Mean ratio | ChR2 Peak ratio | $\Delta$ COMa |
|-------|-----------------|-----------------|---------------|-------|-----------------|-----------------|---------------|
| 1     | 1               | 2.23            | 3.98          | 22    | 0.75            | 0.57            | 2.74          |
| 2     | 0.43            | 0.7             | 9.09          | 23    | 1.65            | 3               | 14.66         |
| 3     | 1.17            | 1.5             | 15.53         | 24    | 0.46            | 0.83            | 26.21         |
| 4     | 2.79            | 2.34            | 7.69          | 25    | 0.17            | 0.25            | 9.42          |
| 5     | 1.2             | 1.05            | 1.17          | 26    | 1.84            | 2               | 5.81          |
| 6     | 0.98            | 0.99            | 8.21          | 27    | 1.5             | 1               | 2.37          |
| 7     | 0.92            | 1.25            | 1.22          | 28    | 1.43            | 1.74            | 1.65          |
| 8     | 0.91            | 1.12            | 1.59          | 29    | 1.12            | 1.88            | 6.51          |
| 9     | 1.07            | 0.57            | 5.46          | 30    | 0.56            | 0.56            | 6.42          |
| 10    | 0.7             | 0.32            | 12.57         | 31    | 1.5             | 1.06            | 15.42         |
| 11    | 0.14            | 0.04            | 31.44         | 32    | 1.19            | 1               | 5.2           |
| 12    | 1.58            | 1.72            | 5.74          | 33    | 1.44            | 1.43            | 0.51          |
| 13    | 1.11            | 1.14            | 9.87          | 34    | 1.01            | 1.5             | 14.79         |
| 14    | 1.51            | 1               | 1.53          | 35    | 0.9             | 2               | 0.8           |
| 15    | 0.64            | 0.43            | 5.51          | 36    | 1.68            | 2               | 16.4          |
| 16    | 1.4             | 1.5             | 0.19          | 37    | 1.29            | 1.5             | 8.2           |
| 17    | 0.98            | 1.5             | 0.19          | 38    | 1.53            | 3.75            | 2.49          |
| 18    | 0.37            | 0.29            | 16.3          | 39    | 0.88            | 1               | 2.67          |
| 19    | 1.04            | 1.29            | 7.41          | 40    | 0.6             | 0.52            | 6.23          |
| 20    | 0.49            | 1.33            | 6             | 41    | 0.78            | 0.52            | 2.18          |
| 21    | 0.82            | 1.08            | 4.23          |       |                 |                 |               |

**Supplementary Table 13:** Intra-field ChR2 spiking ratio and  $\Delta$ COMa of the place cells' spikes in non-ChR2 zone:

| Cell# | ChR2 Mean ratio | ChR2 Peak ratio | $\Delta$ COMa | Cell# | ChR2 Mean ratio | ChR2 Peak ratio | $\Delta$ COMa |
|-------|-----------------|-----------------|---------------|-------|-----------------|-----------------|---------------|
| 1     | 0.87            | 1.32            | 5.35          | 26    | 2.93            | 3.5             | 37.11         |
| 2     | 0.55            | 0.56            | 3.77          | 27    | 2               | 3.21            | 4.83          |
| 3     | 0.5             | 0.23            | 8.31          | 28    | 0.93            | 1.21            | 6.12          |
| 4     | 0.58            | 0.66            | 5.77          | 29    | 1.94            | 2.33            | 0.31          |
| 5     | 2.74            | 4               | 2.5           | 30    | 0.79            | 0.92            | 8.51          |
| 6     | 1.35            | 1.27            | 15.3          | 31    | 0.62            | 0.29            | 14.46         |
| 7     | 1.45            | 2.33            | 6.42          | 32    | 1.64            | 1.5             | 8.55          |
| 8     | 0.99            | 0.95            | 1.91          | 33    | 1.01            | 0.56            | 9.03          |
| 9     | 1.75            | 1.98            | 0.84          | 34    | 1.12            | 1.35            | 8.24          |
| 10    | 1.07            | 0.93            | 23.71         | 35    | 0.6             | 0.52            | 6.31          |
| 11    | 0.88            | 1.15            | 19.98         | 36    | 1.54            | 1.95            | 35.98         |
| 12    | 2.46            | 4.63            | 7.88          | 37    | 3.03            | 4.72            | 30.23         |
| 13    | 0.51            | 0.38            | 3.42          | 38    | 0.39            | 0.46            | 9.13          |
| 14    | 4.18            | 2.63            | 9.01          | 39    | 1.18            | 1.27            | 5.65          |
| 15    | 0.78            | 0.5             | 3.54          | 40    | 0.5             | 0.67            | 23.15         |
| 16    | 0.77            | 0.67            | 22.4          | 41    | 0.53            | 0.43            | 4.06          |
| 17    | 1.34            | 1               | 34.73         | 42    | 0.42            | 0.33            | 13.63         |
| 18    | 0.96            | 2.06            | 0.53          | 43    | 1.06            | 1.11            | 35.65         |
| 19    | 1.19            | 1               | 1.02          | 44    | 0.93            | 0.87            | 4.36          |
| 20    | 1.91            | 0.8             | 16.87         | 45    | 2.63            | 3               | 4.33          |
| 21    | 0.79            | 1               | 11.51         | 46    | 1.54            | 1.67            | 7.89          |
| 22    | 0.89            | 1.11            | 24.8          | 47    | 0.95            | 1               | 1.52          |
| 23    | 1.96            | 1.37            | 4.9           | 48    | 0.38            | 0.6             | 17.14         |
| 24    | 3.17            | 4.17            | 4.36          | 49    | 2.24            | 2.52            | 22.59         |
| 25    | 0.88            | 0.53            | 10.71         |       |                 |                 |               |

**Supplementary Table 14:** Extra-field ChR2 spiking ratio and  $\Delta$ COMa of the place cells' spikes in non-ChR2 zone:

| Cell# | ChR2 Mean ratio | ChR2 Peak ratio | $\Delta$ COMa | Cell# | ChR2 Mean ratio | ChR2 Peak ratio | $\Delta$ COMa |
|-------|-----------------|-----------------|---------------|-------|-----------------|-----------------|---------------|
| 1     | 0.79            | 1.44            | 3.98          | 22    | 1.11            | 0.58            | 2.74          |
| 2     | 1.43            | 3.01            | 9.09          | 23    | 0.1             | 0.09            | 14.66         |
| 3     | 0.31            | 0.42            | 15.53         | 24    | 1.37            | 3.7             | 26.21         |
| 4     | 1.28            | 1.49            | 7.69          | 25    | 1.02            | 1.11            | 9.42          |
| 5     | 1.07            | 1.25            | 1.17          | 26    | 1.07            | 1               | 5.81          |
| 6     | 1.41            | 0.71            | 8.21          | 27    | 1.27            | 1.22            | 2.37          |
| 7     | 1.05            | 0.5             | 1.22          | 28    | 0.86            | 0.56            | 1.65          |
| 8     | 0.65            | 1               | 1.59          | 29    | 0               | 0.01            | 6.51          |
| 9     | 1.21            | 1.24            | 5.46          | 30    | 0.64            | 0.64            | 6.42          |
| 10    | 1.96            | 1.5             | 12.57         | 31    | 1.39            | 1.25            | 15.42         |
| 11    | 1.69            | 1.73            | 31.44         | 32    | 0.69            | 0.79            | 5.2           |
| 12    | 1.35            | 1.09            | 5.74          | 33    | 0.75            | 0.78            | 0.51          |
| 13    | 3.03            | 3.13            | 9.87          | 34    | 2.8             | 2               | 14.79         |
| 14    | 2.18            | 5.65            | 1.53          | 35    | 3.22            | 5.77            | 0.8           |
| 15    | 0.89            | 0.83            | 5.51          | 36    | 0.79            | 0.77            | 12.48         |
| 16    | 1.2             | 0.56            | 0.19          | 37    | 0.77            | 0.6             | 16.4          |
| 17    | 0.67            | 0.45            | 0.19          | 38    | 0.92            | 1.25            | 8.2           |
| 18    | 1.9             | 1.93            | 16.3          | 39    | 1.45            | 1.68            | 2.49          |
| 19    | 2.81            | 2.75            | 7.41          | 40    | 2.29            | 5               | 2.67          |
| 20    | 0.92            | 1.11            | 6             | 41    | 1.53            | 2.7             | 6.23          |
| 21    | 0.51            | 0.85            | 4.23          | 42    | 0.38            | 0.25            | 2.18          |

**Supplementary Table 15:** Unidirectional YFP spiking comparison and  $\Delta$ COM for clockwise fields:

| Cell# | Mean rate | Peak rate | $\Delta$ COM | Cell# | Mean rate | Peak rate | $\Delta$ COM |
|-------|-----------|-----------|--------------|-------|-----------|-----------|--------------|
| 1     | -0.259    | -0.220    | 5.00         | 41    | 0.184     | 0.286     | 0.00         |
| 2     | 0.036     | -0.055    | 0.00         | 42    | 0.074     | -0.024    | 4.00         |
| 3     | 0.089     | -0.035    | 10.00        | 43    | 0.033     | -0.028    | 3.00         |
| 4     | 0.444     | 0.399     | 10.44        | 44    | 0.512     | 0.031     | 21.47        |
| 5     | 0.052     | 0.000     | 5.10         |       |           |           |              |
| 6     | -0.250    | -0.206    | 3.00         |       |           |           |              |
| 7     | 0.091     | 0.023     | 4.24         |       |           |           |              |
| 8     | -0.674    | -0.802    | 39.46        |       |           |           |              |
| 9     | -0.169    | -0.305    | 3.00         |       |           |           |              |
| 10    | 0.190     | 0.140     | 3.00         |       |           |           |              |
| 11    | 0.059     | 0.132     | 0.00         |       |           |           |              |
| 12    | 0.228     | 0.161     | 9.00         |       |           |           |              |
| 13    | -0.271    | -0.309    | 4.24         |       |           |           |              |
| 14    | 0.143     | 0.200     | 0.00         |       |           |           |              |
| 15    | 0.262     | 0.280     | 10.00        |       |           |           |              |
| 16    | 0.240     | 0.357     | 3.00         |       |           |           |              |
| 17    | 0.429     | 0.400     | 4.24         |       |           |           |              |
| 18    | 0.680     | 0.558     | 3.00         |       |           |           |              |
| 19    | -0.263    | -0.256    | 0.00         |       |           |           |              |
| 20    | -0.077    | -0.079    | 6.00         |       |           |           |              |
| 21    | 0.035     | 0.065     | 3.00         |       |           |           |              |
| 22    | 0.182     | 0.016     | 6.00         |       |           |           |              |
| 23    | -0.025    | 0.358     | 18.11        |       |           |           |              |
| 24    | 0.333     | 0.488     | 6.00         |       |           |           |              |
| 25    | -0.433    | -0.299    | 0.00         |       |           |           |              |
| 26    | -0.068    | -0.179    | 0.00         |       |           |           |              |
| 27    | -0.333    | -0.482    | 4.00         |       |           |           |              |
| 28    | 0.537     | 0.571     | 7.00         |       |           |           |              |
| 29    | -0.048    | 0.116     | 10.44        |       |           |           |              |
| 30    | -0.058    | 0.124     | 5.00         |       |           |           |              |
| 31    | 0.147     | 0.143     | 0.00         |       |           |           |              |
| 32    | 0.163     | 0.000     | 8.06         |       |           |           |              |
| 33    | -0.321    | -0.579    | 16.28        |       |           |           |              |
| 34    | -0.077    | -0.103    | 4.00         |       |           |           |              |
| 35    | 0.114     | 0.329     | 0.00         |       |           |           |              |
| 36    | -0.421    | -0.195    | 0.00         |       |           |           |              |
| 37    | -0.440    | -0.319    | 0.00         |       |           |           |              |
| 38    | -0.306    | -0.263    | 7.00         |       |           |           |              |
| 39    | 0.150     | 0.282     | 3.00         |       |           |           |              |
| 40    | -0.042    | 0.034     | 0.00         |       |           |           |              |



**Supplementary Table 16:** Unidirectional YFP spiking comparison and  $\Delta$ COM, counter-clockwise fields:

| Cell# | Mean rate | Peak rate | $\Delta$ COM | Cell# | Mean rate | Peak rate | $\Delta$ COM |
|-------|-----------|-----------|--------------|-------|-----------|-----------|--------------|
| 1     | 0.037     | -0.055    | 0.00         |       |           |           |              |
| 2     | -0.281    | -0.257    | 7.00         |       |           |           |              |
| 3     | 0.167     | 0.026     | 14.32        |       |           |           |              |
| 4     | -0.383    | -0.283    | 13.00        |       |           |           |              |
| 5     | -0.010    | 0.036     | 2.83         |       |           |           |              |
| 6     | -0.005    | -0.102    | 3.00         |       |           |           |              |
| 7     | 0.059     | -0.152    | 13.34        |       |           |           |              |
| 8     | 0.259     | 0.261     | 3.00         |       |           |           |              |
| 9     | -0.008    | 0.099     | 10.00        |       |           |           |              |
| 10    | -0.009    | -0.161    | 3.00         |       |           |           |              |
| 11    | -0.086    | -0.013    | 0.00         |       |           |           |              |
| 12    | -0.023    | -0.011    | 0.00         |       |           |           |              |
| 13    | -0.309    | -0.091    | 6.00         |       |           |           |              |
| 14    | 0.200     | 0.390     | 0.00         |       |           |           |              |
| 15    | 0.054     | 0.131     | 6.71         |       |           |           |              |
| 16    | 0.350     | 0.284     | 3.00         |       |           |           |              |
| 17    | 0.319     | 0.293     | 0.00         |       |           |           |              |
| 18    | 0.035     | -0.153    | 3.00         |       |           |           |              |
| 19    | 0.118     | 0.010     | 13.60        |       |           |           |              |
| 20    | 0.000     | -0.298    | 3.00         |       |           |           |              |
| 21    | 0.100     | 0.539     | 4.24         |       |           |           |              |
| 22    | 0.405     | 0.432     | 4.00         |       |           |           |              |
| 23    | 0.188     | 0.091     | 16.16        |       |           |           |              |
| 24    | 0.371     | 0.290     | 0.00         |       |           |           |              |
| 25    | 0.232     | 0.359     | 4.00         |       |           |           |              |
| 26    | 0.100     | 0.231     | 0.00         |       |           |           |              |
| 27    | -0.143    | 0.083     | 0.00         |       |           |           |              |
| 28    | -0.475    | -0.405    | 3.00         |       |           |           |              |
| 29    | -0.256    | -0.473    | 4.00         |       |           |           |              |
| 30    | -0.161    | -0.029    | 3.00         |       |           |           |              |
| 31    | 0.125     | -0.032    | 4.00         |       |           |           |              |
| 32    | 0.486     | 0.379     | 7.00         |       |           |           |              |
| 33    | 0.231     | 0.434     | 5.00         |       |           |           |              |
| 34    | -0.770    | -0.815    | 3.00         |       |           |           |              |
| 35    | 0.208     | 0.304     | 0.00         |       |           |           |              |
| 36    | -0.684    | -0.600    | 6.00         |       |           |           |              |
| 37    | -0.660    | -0.597    | 10.44        |       |           |           |              |
| 38    | 0.302     | 0.333     | 3.00         |       |           |           |              |
| 39    | 0.102     | -0.004    | 0.00         |       |           |           |              |
| 40    | 0.028     | 0.333     | 5.66         |       |           |           |              |

**Supplementary Table 17:** Unidirectional Chr2 spiking comparison and  $\Delta$ COM for clockwise fields:

| Cell# | Mean rate | Peak rate | $\Delta$ COM | Cell# | Mean rate | Peak rate | $\Delta$ COM |
|-------|-----------|-----------|--------------|-------|-----------|-----------|--------------|
| 1     | -0.437    | -0.472    | 4.24         | 41    | -0.500    | -0.694    | 45.10        |
| 2     | -0.080    | -0.004    | 0.00         | 42    | 0.534     | 0.277     | 26.00        |
| 3     | -0.179    | -0.282    | 6.00         | 43    | -0.183    | -0.011    | 66.85        |
| 4     | 0.388     | 0.415     | 74.06        | 44    | 0.531     | 0.613     | 10.00        |
| 5     | 0.355     | 0.083     | 39.05        | 45    | -0.564    | -0.500    | 4.00         |
| 6     | -0.355    | -0.304    | 6.71         | 46    | 0.000     | 0.000     | 4.00         |
| 7     | 0.205     | 0.053     | 7.00         | 47    | -0.200    | -0.160    | 5.10         |
| 8     | -0.143    | -0.190    | 9.43         | 48    | 0.500     | 0.465     | 86.27        |
| 9     | -0.472    | -0.541    | 75.80        | 49    | 0.300     | 0.347     | 60.88        |
| 10    | -0.263    | -0.288    | 3.00         | 50    | -0.392    | -0.471    | 95.46        |
| 11    | -0.185    | -0.083    | 7.62         | 51    | 0.667     | 0.799     | 73.41        |
| 12    | -0.250    | -0.244    | 3.00         | 52    | 0.046     | -0.059    | 5.00         |
| 13    | -0.212    | -0.324    | 3.00         | 53    | 1.000     | 0.972     | 63.06        |
| 14    | 0.096     | 0.014     | 7.00         | 54    | 0.767     | 0.836     | 7.62         |
| 15    | 0.288     | 0.307     | 10.00        | 55    | 0.116     | -0.269    | 55.54        |
| 16    | -0.438    | -0.446    | 22.00        | 56    | 0.464     | 0.454     | 4.00         |
| 17    | -0.565    | -0.721    | 3.00         | 57    | -0.212    | -0.194    | 6.71         |
| 18    | 0.600     | 0.475     | 7.00         | 58    | 0.042     | -0.045    | 50.54        |
| 19    | 0.733     | 0.857     | 48.00        | 59    | 0.230     | 0.308     | 6.00         |
| 20    | -0.080    | 0.183     | 4.24         | 60    | 0.012     | 0.173     | 3.00         |
| 21    | 0.500     | 0.545     | 4.24         | 61    | -0.438    | -0.603    | 6.00         |
| 22    | 0.088     | -0.074    | 65.92        | 62    | 0.167     | 0.200     | 57.01        |
| 23    | -0.866    | -0.761    | 48.09        | 63    | 0.182     | 0.422     | 2.00         |
| 24    | 0.000     | 0.353     | 13.00        | 64    | -0.539    | -0.581    | 5.00         |
| 25    | -0.571    | -0.619    | 76.55        | 65    | -0.366    | -0.449    | 3.00         |
| 26    | -0.121    | -0.021    | 3.00         | 66    | 0.231     | 0.280     | 74.06        |
| 27    | -0.023    | -0.031    | 55.80        | 67    | -0.171    | -0.261    | 0.00         |
| 28    | 0.457     | 0.371     | 0.00         | 68    | 0.150     | 0.117     | 32.14        |
| 29    | 0.500     | 0.783     | 64.20        | 69    | 0.479     | 0.466     | 71.06        |
| 30    | 0.234     | 0.327     | 41.23        | 70    | 0.156     | 0.113     | 0.00         |
| 31    | 0.311     | 0.117     | 51.04        | 71    | -0.143    | -0.039    | 2.00         |
| 32    | -0.259    | 0.240     | 22.00        | 72    | 0.136     | 0.168     | 42.15        |
| 33    | 0.247     | 0.232     | 10.00        | 73    | -0.040    | 0.131     | 16.28        |
| 34    | 0.008     | -0.188    | 3.16         | 74    | 0.116     | 0.379     | 26.00        |
| 35    | 0.547     | 0.485     | 0.00         | 75    | -0.280    | -0.149    | 7.00         |
| 36    | -0.186    | -0.091    | 56.86        | 76    | 0.811     | 0.867     | 18.03        |
| 37    | 0.164     | 0.311     | 10.44        | 77    | -0.035    | 0.003     | 4.24         |
| 38    | 0.726     | 0.795     | 43.91        | 78    | 0.481     | 0.534     | 0.00         |
| 39    | 0.185     | 0.228     | 3.00         | 79    | -0.098    | 0.018     | 2.24         |
| 40    | 0.176     | -0.250    | 2.24         | 80    | -0.474    | -0.450    | 7.00         |

**Supplementary Table 18:** Unidirectional ChR2 spiking comparison and  $\Delta$ COM, counter-clockwise fields:

| Cell# | Mean rate | Peak rate | $\Delta$ COM | Cell# | Mean rate | Peak rate | $\Delta$ COM |
|-------|-----------|-----------|--------------|-------|-----------|-----------|--------------|
| 1     | -0.083    | -0.049    | 75.69        | 41    | 0.622     | 0.762     | 3.00         |
| 2     | -0.143    | 0.036     | 3.00         | 42    | 0.138     | 0.129     | 20.00        |
| 3     | 0.607     | 0.790     | 19.00        | 43    | 0.000     | -0.011    | 4.00         |
| 4     | -0.286    | 0.148     | 73.41        | 44    | -0.211    | -0.200    | 3.00         |
| 5     | -0.295    | -0.175    | 66.85        | 45    | -0.570    | -0.465    | 68.01        |
| 6     | 0.226     | 0.273     | 3.00         | 46    | -0.014    | 0.127     | 0.00         |
| 7     | -0.780    | -0.728    | 10.30        | 47    | -0.207    | -0.383    | 8.06         |
| 8     | 0.425     | 0.506     | 10.00        | 48    | -0.639    | -0.538    | 32.14        |
| 9     | 0.154     | 0.368     | 76.55        | 49    | -0.316    | -0.092    | 3.00         |
| 10    | 0.132     | 0.000     | 4.24         | 50    | 0.000     | -0.370    | 3.00         |
| 11    | 0.333     | 0.111     | 32.14        | 51    | -0.091    | 0.184     | 51.00        |
| 12    | 0.683     | 0.632     | 5.66         | 52    | -0.176    | -0.205    | 7.07         |
| 13    | -0.352    | -0.564    | 36.12        | 53    | -0.539    | -0.581    | 5.00         |
| 14    | 0.000     | 0.157     | 3.00         | 54    | 0.323     | 0.406     | 4.00         |
| 15    | 0.158     | 0.000     | 86.37        | 55    | 0.306     | 0.359     | 10.00        |
| 16    | -0.111    | -0.290    | 28.28        | 56    | 0.254     | 0.262     | 7.00         |
| 17    | 0.600     | 0.345     | 48.85        | 57    | 0.376     | 0.517     | 5.66         |
| 18    | -0.754    | -0.822    | 42.58        | 58    | -0.522    | -0.597    | 9.49         |
| 19    | -0.100    | 0.043     | 70.29        | 59    | -0.288    | -0.470    | 13.00        |
| 20    | 0.800     | 0.917     | 16.28        | 60    | -0.731    | -0.670    | 52.09        |
| 21    | 0.200     | 0.273     | 23.00        | 61    | -0.412    | -0.226    | 16.00        |
| 22    | -0.739    | -0.766    | 42.11        | 62    | 0.455     | 0.443     | 0.00         |
| 23    | -0.125    | -0.184    | 77.52        | 63    | 0.321     | 0.085     | 4.00         |
| 24    | -0.004    | -0.009    | 12.00        | 64    | -0.143    | -0.178    | 3.00         |
| 25    | -0.162    | -0.081    | 10.44        | 65    | 0.003     | 0.005     | 4.00         |
| 26    | 0.392     | 0.429     | 7.00         | 66    | 0.250     | 0.467     | 84.17        |
| 27    | 0.897     | 0.965     | 60.17        | 67    | 0.301     | 0.144     | 4.24         |
| 28    | -0.120    | -0.035    | 6.00         | 68    | 0.223     | 0.348     | 35.51        |
| 29    | -0.548    | -0.554    | 9.49         | 69    | 0.004     | -0.019    | 3.00         |
| 30    | 0.690     | 0.575     | 8.06         | 70    | 0.429     | 0.435     | 23.00        |
| 31    | 0.425     | 0.451     | 9.00         | 71    | -0.053    | 0.000     | 3.00         |
| 32    | 0.254     | 0.311     | 65.97        | 72    | 0.742     | 0.841     | 63.64        |
| 33    | -0.484    | -0.621    | 10.00        | 73    | 0.118     | 0.206     | 4.00         |
| 34    | 0.923     | 0.913     | 16.28        | 74    | -0.257    | -0.095    | 76.55        |
| 35    | -0.009    | -0.214    | 1.41         |       |           |           |              |
| 36    | -0.123    | -0.136    | 6.71         |       |           |           |              |
| 37    | 0.362     | 0.492     | 9.85         |       |           |           |              |
| 38    | 0.297     | 0.242     | 9.85         |       |           |           |              |
| 39    | 0.429     | 0.497     | 29.61        |       |           |           |              |
| 40    | 0.636     | -0.056    | 25.02        |       |           |           |              |
